# Supplementary material for: Development of an automated chemiluminescence assay system for quantitative measurement of multiple anti-SARS-CoV-2 antibodies
Source: bioRxiv or medRxiv preprint supplement (doi:10.1101/2020.11.04.20225805), 2020-11-06

Figure 4

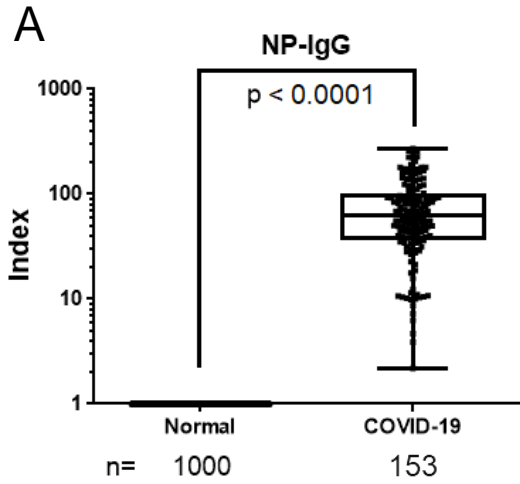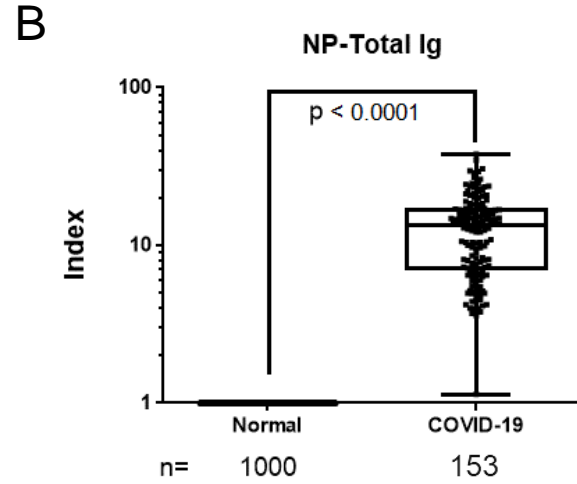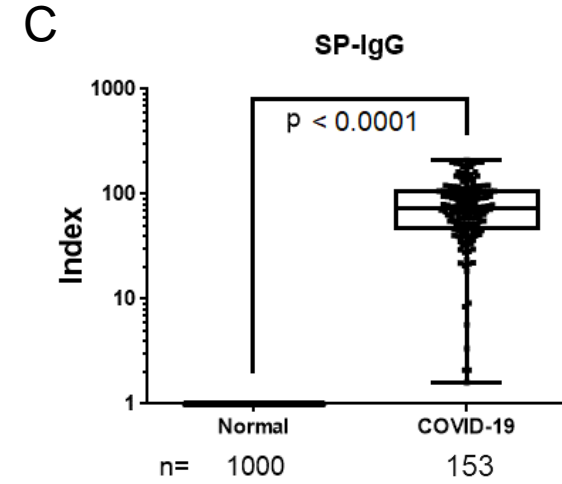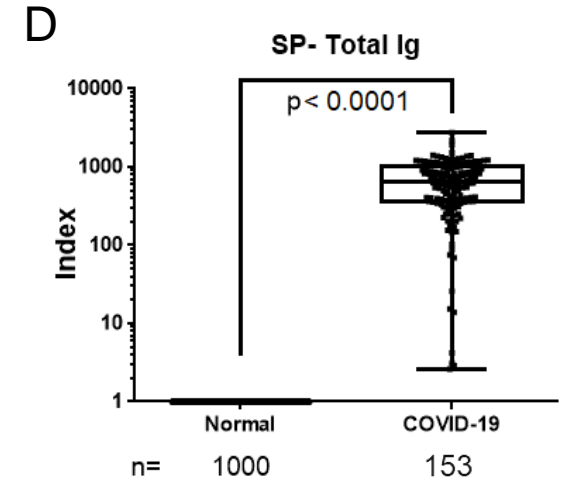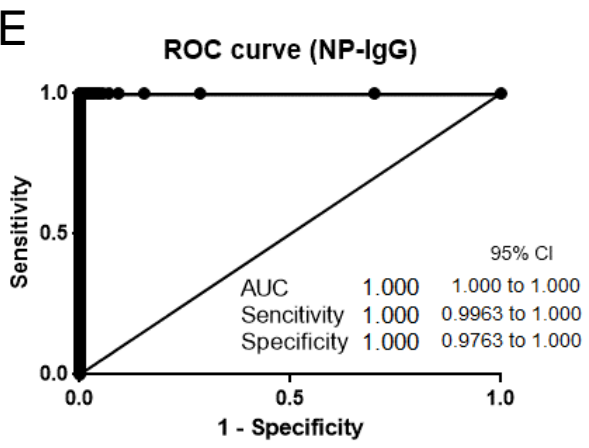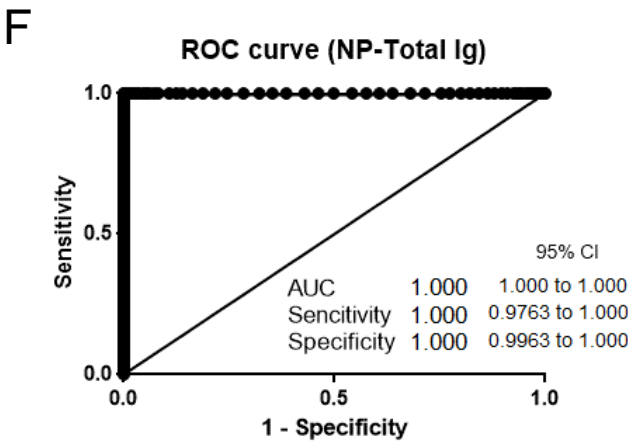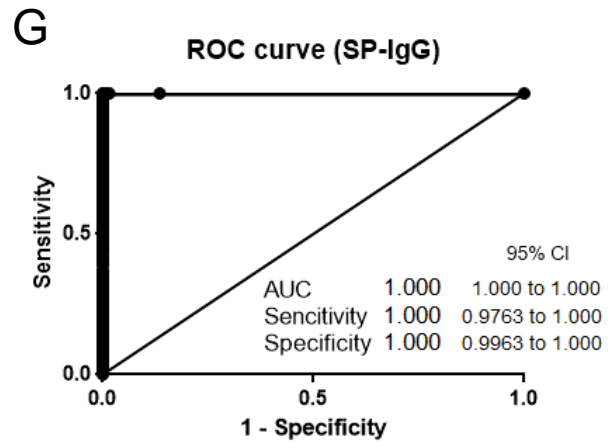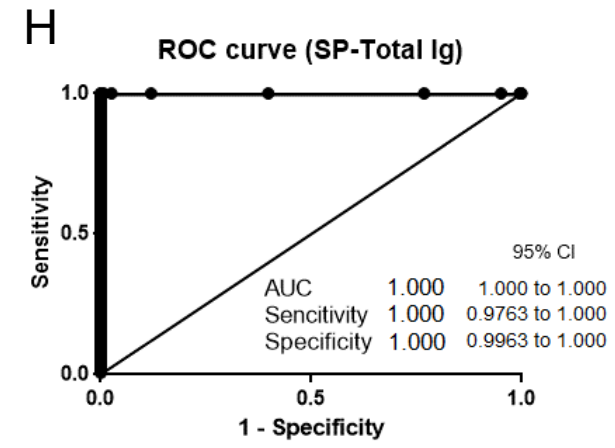

Supplement: Supplementary file [file media-1.pdf]
